# Supplementary material for: Patient harm from cardiovascular medications
Source: PubMed Central journal article supplement — Ther Adv Drug Saf. 2021 Jul 25;12:20420986211027451. doi: 10.1177/20420986211027451 (PMC8317255; doi:10.1177/20420986211027451), 2021-07-25
Supplement: sj-pdf-2-taw-10.1177_20420986211027451.pdf [file sj-pdf-2-taw-10.1177_20420986211027451.pdf]

**Online resource 2: Number of medication harm studies conducted in each country**

| <b>Country (n=41)</b>                                                                                                                                                                                                                                                                                      | <b>Number of studies (n=75)</b> | <b>Continent (n=6)</b>                                                      |
|------------------------------------------------------------------------------------------------------------------------------------------------------------------------------------------------------------------------------------------------------------------------------------------------------------|---------------------------------|-----------------------------------------------------------------------------|
| United States of America                                                                                                                                                                                                                                                                                   | 19                              | North America                                                               |
| Australia                                                                                                                                                                                                                                                                                                  | 14                              | Australia/Oceania                                                           |
| Italy                                                                                                                                                                                                                                                                                                      | 6                               | Europe                                                                      |
| United Kingdom                                                                                                                                                                                                                                                                                             | 6                               | Europe                                                                      |
| France                                                                                                                                                                                                                                                                                                     | 3                               | Europe                                                                      |
| Columbia                                                                                                                                                                                                                                                                                                   | 2                               | South America                                                               |
| Ireland                                                                                                                                                                                                                                                                                                    | 2                               | Europe                                                                      |
| New Zealand                                                                                                                                                                                                                                                                                                | 2                               | Australia/Oceania                                                           |
| Sweden                                                                                                                                                                                                                                                                                                     | 2                               | Europe                                                                      |
| Brazil                                                                                                                                                                                                                                                                                                     | 1                               | South America                                                               |
| Denmark                                                                                                                                                                                                                                                                                                    | 1                               | Europe                                                                      |
| Germany                                                                                                                                                                                                                                                                                                    | 1                               | Europe                                                                      |
| Japan                                                                                                                                                                                                                                                                                                      | 1                               | Asia                                                                        |
| Slovak Republic                                                                                                                                                                                                                                                                                            | 1                               | Europe                                                                      |
| Spain                                                                                                                                                                                                                                                                                                      | 1                               | Europe                                                                      |
| United Arab Emirates                                                                                                                                                                                                                                                                                       | 1                               | Asia                                                                        |
| Multiple countries*:<br>(In addition to above: Argentina,<br>Austria, Belgium, Canada, China,<br>Croatia, Finland, Greece, India,<br>Iran, Israel, Lebanon, Malaysia,<br>Morocco, Netherlands, Norway,<br>Peru, Scotland, Singapore,<br>Slovenia, South Africa, Sri Lanka,<br>Switzerland, Taiwan, Uganda) | 12                              | Africa, Asia, Australia/Oceania,<br>Europe, North America, South<br>America |

\*Systematic and literature reviews include literature from multiple countries
