# Supplementary material for: Patient harm from cardiovascular medications
Source: PubMed Central journal article supplement — Ther Adv Drug Saf. 2021 Jul 25;12:20420986211027451. doi: 10.1177/20420986211027451 (PMC8317255; doi:10.1177/20420986211027451), 2021-07-25
Supplement: sj-pdf-3-taw-10.1177_20420986211027451.pdf [file sj-pdf-3-taw-10.1177_20420986211027451.pdf]

| <b>Online Resource 3: Studies investigating medication harm in older populations</b> |                                                      |                                          |                                                    |                                |                                           |                                                                                                                                                                                                            |
|--------------------------------------------------------------------------------------|------------------------------------------------------|------------------------------------------|----------------------------------------------------|--------------------------------|-------------------------------------------|------------------------------------------------------------------------------------------------------------------------------------------------------------------------------------------------------------|
| <b>Author/Year</b>                                                                   | <b>Type of Study</b>                                 | <b>Setting/ location</b>                 | <b>Population/age group/ (n=)</b>                  | <b>Type of medication harm</b> | <b>Method of detection</b>                | <b>Medications implicated (%)</b>                                                                                                                                                                          |
| <b>Australian studies</b>                                                            |                                                      |                                          |                                                    |                                |                                           |                                                                                                                                                                                                            |
| <b>Chan et al./ 2001 [26]</b>                                                        | Prospective, cross-sectional survey                  | Public hospital/ Tasmania                | ≥75yrs admitted to hospital / (n=219)              | ADE                            | Patient interview                         | CV (48.4% of ADEs)<br>CNS (20.5%)<br>Anti-inflammatories (10.6%)<br>AT (5.7%)<br>Others (15.6%)                                                                                                            |
| <b>Burgess et al. / 2005 [50]</b>                                                    | Retrospective secondary data analysis of case series | Public and private hospitals/ WA         | >60yrs admitted between 1981 and 2002/ (n= 43,380) | ADR                            | ICD codes                                 | CV (17.5% of patients with ADRs)<br>Analgesics, antipyretics and antirheumatics (16.5%)<br>Agents affecting blood constituents (9%)<br>Antibiotics (9%)                                                    |
| <b>Paradissis et.al./ 2017 [22]</b>                                                  | ROS                                                  | Metropolitan teaching hospital/ Brisbane | ≥65yrs admitted to internal medical wards/ (n=164) | ADRin and ADRad                | TT with expert panel consensus            | <u>ADRin:</u><br>CV (41.7% of patients with ADRin)<br>Haematological<br>Anti-infectives<br>CNS,<br>Opioids and other<br><u>ADRad:</u><br>CV (48% of patients with ADRad)<br>Haematological<br>Other<br>CNS |
| <b>Parameswaran et al. /2017 [60]</b>                                                | Prospective, cross-sectional study                   | Two public hospitals/ Tasmania           | ≥65yrs admitted to hospital/ (n=1008)              | ADR                            | Expert consensus through detailed MRR and | CV (59.5% of the drugs implicated in causing ADRs):<br>Diuretics (23.9%)<br>ACE-I (16.4%)                                                                                                                  |

|                                  |     |                                                     |                                                                                                           |     |                             |                                                                                                                                                                                                                                                                                                                                                                                                                                                                         |
|----------------------------------|-----|-----------------------------------------------------|-----------------------------------------------------------------------------------------------------------|-----|-----------------------------|-------------------------------------------------------------------------------------------------------------------------------------------------------------------------------------------------------------------------------------------------------------------------------------------------------------------------------------------------------------------------------------------------------------------------------------------------------------------------|
|                                  |     |                                                     |                                                                                                           |     | patient interview           | BB (7.1%)<br>Antidepressants (6.9%)<br>ATs (6.9%)                                                                                                                                                                                                                                                                                                                                                                                                                       |
| <b>Mullan et al/ 2019 [64]</b>   | ROS | Illawarra health information platform database/ NSW | ≥65yrs with and without dementia hospitalised between 1 Jan 2012 and 31 Dec 2016 / (n=228,165 admissions) | MM  | ICD codes                   | <u>With dementia:</u><br>Anticoagulants (15.7% of MM)<br>Opioids (8.6%)<br>Antipsychotics and neuroleptics (5.5%)<br>AntiHTN (3.9%)<br>BB (3.4%)<br>Insulin (2.7%)<br>Antidepressants (2.7%)<br>ACE-I (2.5%)<br>BZD (2.2%)<br><u>Without dementia:</u><br>Anticoagulants (20.7%)<br>Opioids (10%)<br>Glucocorticoids (5.9%)<br>Antineoplastics (5.3%)<br>AntiHTN (4.7%)<br>BB (4.1%)<br>Cardiac glycosides (2.6%)<br>Diuretics (2.1%)<br>Insulin (2.1%)<br>ACE-I (2.0%) |
| <b>International studies</b>     |     |                                                     |                                                                                                           |     |                             |                                                                                                                                                                                                                                                                                                                                                                                                                                                                         |
| <b>Doucet et al./ 2002 [77]</b>  | POS | Geriatric unit at Univeristy hospital/ France       | ≥70 years/ (n=2814)                                                                                       | ADE | MRR and expert review       | CV (43.7%)<br>Psychotropic (31.1%)<br>Antibiotics (6.6%)<br>Anticoagulants (4.3%)                                                                                                                                                                                                                                                                                                                                                                                       |
| <b>Gurwitz et al./ 2003 [87]</b> | RCS | Ambulatory clinic patients/ USA                     | ≥ 65 yrs/ (n=27,617)                                                                                      | ADE | Clinician reports, computer | CV (24.5%)<br>Diuretics (22.1%)<br>Nonopioid analgesics (15.4%)                                                                                                                                                                                                                                                                                                                                                                                                         |

|                                    |     |                                                                      |                                                  |                 |                        |                                                                                                                                                                                                                                 |
|------------------------------------|-----|----------------------------------------------------------------------|--------------------------------------------------|-----------------|------------------------|---------------------------------------------------------------------------------------------------------------------------------------------------------------------------------------------------------------------------------|
|                                    |     |                                                                      |                                                  |                 | generated prompts, MRR | Hypoglycaemics (10.9%)<br>Anticoagulants (10.2%)                                                                                                                                                                                |
| <b>Passarelli et al./2005 [37]</b> | POS | Teaching hospital/<br>Brazil                                         | ≥60yrs admitted to internal medicine/<br>(n=186) | ADRad and ADRin | Drug surveillance      | <u>ADRad:</u><br>Digoxin (% not specified)<br>NSAIDs<br>Insulin or oral antidiabetic agents<br><u>ADRin:</u><br>Diuretics<br>Antibacterials<br>Captopril                                                                        |
| <b>Hanlon et al./2006 [84]</b>     | PCS | Eleven veteran affairs hospitals – medical or surgical wards/<br>USA | Frail ≥65yrs/<br>(n=808)                         | ADRs            | MRR                    | Anticoagulants (8.6% of ADRs)<br>Diuretics (8.5%)<br>ACE-I (6.2%)<br>Antidiabetics/anticholinergics (6.2%)<br>Anti-infectives/NSAIDs (5.4%)<br>Nontricyclic antidepressants (4.8%)<br>Digoxin (4.4%)<br>BB (4.2%)<br>CCB (3.8%) |
| <b>Ocampo et al./2008 [53]</b>     | CSS | Hospital emergency department/<br>Columbia                           | Patients ≥60 years/<br>(n=400)                   | ADE and ADR     | MRR                    | Antiplatelets (19.7%)<br>Hypoglycaemics (15.9%)<br>Diuretic (13%)<br>NSAIDs (12%)<br>CV (10.2%)                                                                                                                                 |
| <b>Cecile et al./2009 [69]</b>     | RCS | University hospital/<br>France                                       | ≥65yrs/<br>(n=823)                               | ADEs            | MRR                    | AntiHTN and antiarrhythmics (23.2% of ADEs)<br>Psychotropics (17.9%)<br>Anti-infectives (17%)                                                                                                                                   |

|                                  |                              |                                       |                                                              |                 |                            |                                                                                                                                                                                               |
|----------------------------------|------------------------------|---------------------------------------|--------------------------------------------------------------|-----------------|----------------------------|-----------------------------------------------------------------------------------------------------------------------------------------------------------------------------------------------|
|                                  |                              |                                       |                                                              |                 |                            | Diuretics (15.2%)<br>AT (8.9%)                                                                                                                                                                |
| <b>Trivalle et al./2010 [79]</b> | Randomised prospective trial | Geriatric centres/ France             | ≥65 years/ (n=576)                                           | ADE             | MRR using checklist        | CV (19.8%)<br>Analgesics (12.8%)<br>Antipsychotics (12%)<br>Anticoagulants (6.4%)<br>Antidepressants (3.8%)                                                                                   |
| <b>Budnitz et al./2011 [6]</b>   | RCS                          | 58 non-paediatric hospitals/ USA      | ≥65years presenting to emergency/ (n=estimated 99,628 cases) | ADE             | National surveillance data | Haematological (42.3%)<br>Endocrine (22.8%)<br>CV (9.8%)<br>CNS (9.7%)<br>Anti-infective (3.8%)                                                                                               |
| <b>Conforti et al./2012 [55]</b> | PCS                          | University hospital/ Italy            | ≥65yrs admitted to hospital/ (n=1023)                        | ADRin and ADRad | Clinician reporting        | <u>ADRad:</u><br>Diuretics (% not specified)<br>AT<br>ACE-I<br><u>ADRin:</u><br>Furosemide (71 cases)<br>Enoxaparin (31 cases)<br>Warfarin (17 cases)<br>Ampicillin plus sulbactam (16 cases) |
| <b>Marcum et al./2012 [56]</b>   | RCS                          | Veterans affairs medical centre/ USA  | ≥65yrs veterans/ (n=6778)                                    | ADR             | MRR and panel consensus    | CV (% not specified)<br>CNS<br>AT<br>Endocrine                                                                                                                                                |
| <b>O'Connor et al./2012 [68]</b> | PCS                          | University teaching hospital/ Ireland | ≥65yrs/ (n=513)                                              | ADRs            | Predictive risk score      | Diuretics (25% of ADRs)<br>BZD (18%)<br>Opioids (18%)<br>Anti-hypertensives (17%)                                                                                                             |
| <b>Kanaan et al./2013 [85]</b>   | RCS                          | Large multispecialty                  | ≥65yrs within 45 days of discharge/                          | ADEs and pADEs  | MRR and panel consensus    | <u>ADEs:</u><br>CV (35.5%)                                                                                                                                                                    |

|                                         |     |                                     |                                                       |     |                                                      |                                                                                                                                                                                                               |
|-----------------------------------------|-----|-------------------------------------|-------------------------------------------------------|-----|------------------------------------------------------|---------------------------------------------------------------------------------------------------------------------------------------------------------------------------------------------------------------|
|                                         |     | group practice/<br>USA              | (n=1000)                                              |     |                                                      | Diuretics (20.2%)<br>Opioids (9.5%)<br>Anti-infectives (7.9%)<br>AT (7.4%)<br><u>pADEs:</u><br>CV (40.5%)<br>Diuretics (23.8%)<br>Opioids (16.7%)<br>NSAIDs (8.3%)<br>Anticoagulants (6.0%)<br>Aspirin (6.0%) |
| <b>Gustafsson et al./<br/>2016 [34]</b> | ROS | University<br>hospital/ Sweden      | ≥65 years with<br>cognitive<br>impairment/<br>(n=458) | DRP | MRR and panel<br>consensus                           | CV (29.5%)<br>Psychotropic (27.3%)<br>Analgesic (7.6%)<br>Respiratory (7.2%)<br>AT (6.8%)                                                                                                                     |
| <b>Carnovale et al./<br/>2016 [97]</b>  | OS  | Nursing homes/<br>Italy             | ≥65years/<br>(n=1073 cases)                           | ADR | Physician<br>reporting                               | Vaccines (37.5%)<br>Antibacterials (21.6%)<br>Antineoplastic (9.5%)<br>Psycholeptics (6.7%)<br>Anti-inflammatory (5%)                                                                                         |
| <b>Ognibene et al./<br/>2018 [62]</b>   | ROS | Internal medicine<br>unit/ Italy    | ≥65 years /<br>(n=1750)                               | ADR | MRR                                                  | Diuretics (17.9%)<br>AT (14.7%)<br>CNS (9.4%)                                                                                                                                                                 |
| <b>Parekh et al./<br/>2018 [90]</b>     | PCS | Five teaching<br>hospitals/ England | ≥ 65yrs/<br>(n=1280)                                  | MRH | Telephone<br>interview with<br>questionnaire,<br>MRR | AntiHTN (22.4%)<br>Opioids (17.2%)<br>Diuretics (12.2%)<br>Antibiotics (10.5%)<br>Anticoagulants (6.6%)<br>Laxatives (6.6%)                                                                                   |

*ACE-I* is angiotensin converting enzyme inhibitors, *ADR* is adverse drug reaction, *ADRad* is adverse drug reactions causing admission, *ADRin* is inpatient adverse drug reactions, *ADE* is adverse drug event, *AntiHTN* is antihypertensives, *AT* is antithrombotics, *BB* is beta-blockers, *BZD* is benzodiazepines, *CCB* is calcium channel blockers, *CNS* is central nervous system, *CV* is cardiovascular, *DRP* is drug related problems, *ICD* is International classification

---

of diseases, *MM* is medication misadventure, *MRH* is medication-related harm, *MRR* is medical record review, *NSAIDs* is non-steroidal anti-inflammatory drugs, *NSW* is New South Wales, *pADEs* is preventable adverse drug events, *PCS* is prospective cohort study, *POS* is prospective observational study, *OS* is observational study, *RCS* is retrospective cohort study, *ROS* is retrospective observational study, *TT* is trigger tool, *USA* is United States of America, *WA* is Western Australia

---
