# Supplementary figures and images for: Patient harm from cardiovascular medications
Source: PubMed Central journal article supplement — Ther Adv Drug Saf. 2021 Jul 25;12:20420986211027451. doi: 10.1177/20420986211027451 (PMC8317255; doi:10.1177/20420986211027451), 2021-07-25

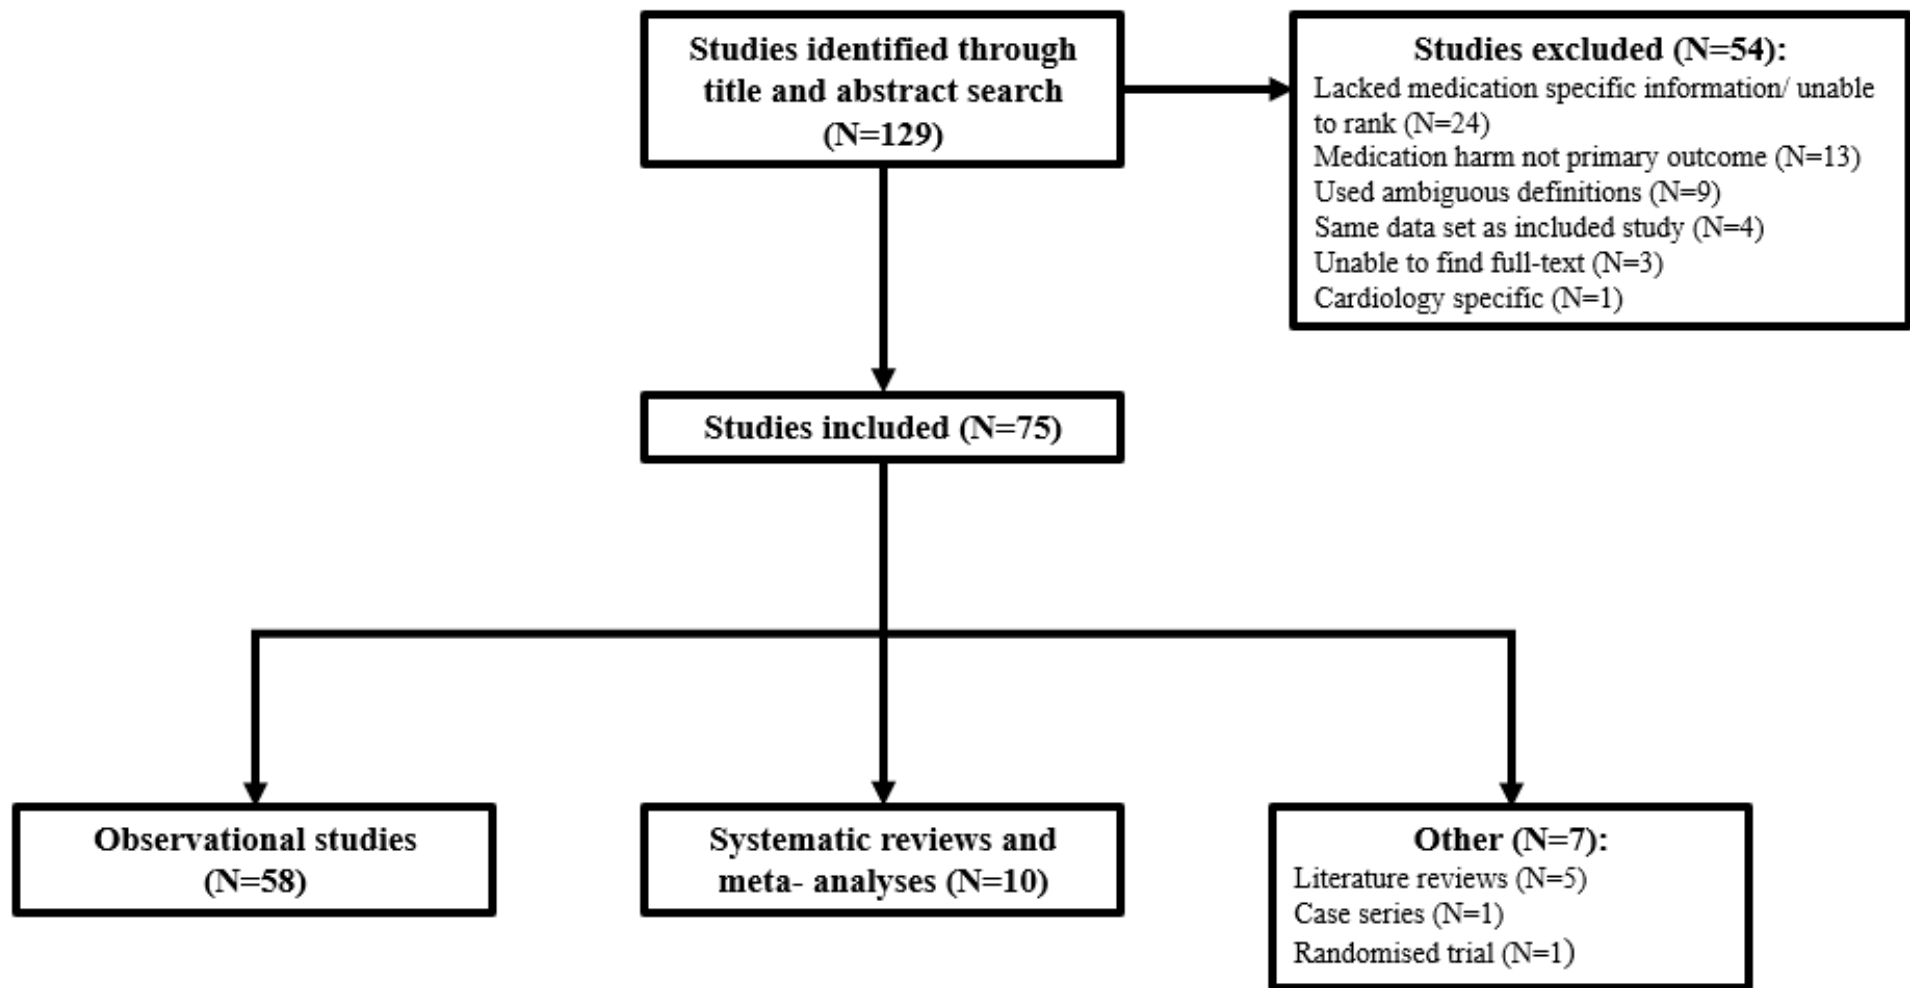

*Online Resource 1: A flow diagram of study inclusion and exclusion criteria and study type*

Supplement: sj-pdf-1-taw-10.1177_20420986211027451.pdf [file sj-pdf-1-taw-10.1177_20420986211027451.pdf]
